# Supplementary material for: SERS for Detection of Proteinuria: A Comparison of Gold, Silver, Al Tape, and Silicon Substrates for Identification of Elevated Protein Concentration in Urine
Source: MDPI journal article supplement (doi:10.3390/s23031605), 2023-02-01
Supplement: s1 [file s1]

## Supplementary Information

# SERS for Detection of Proteinuria: A Comparison of Gold, Silver, Al Tape, and Silicon Substrates for Identification of Elevated Protein Concentration in Urine

Sultan Aitekenov <sup>1</sup>, Alisher Sultangaziyev <sup>1</sup>, Aigerim Boranova <sup>1</sup>, Aigerim Dyussupova <sup>1</sup>, Aisha Ilyas <sup>1</sup>,  
Abduzhappar Gaipov <sup>2</sup> and Rostislav Bukasov <sup>1,\*</sup>

<sup>1</sup> Department of Chemistry, School of Sciences and Humanities (SSH) Nazarbayev University, Nur-Sultan 010000, Kazakhstan

<sup>2</sup> Department of Medicine, School of Medicine, Nazarbayev University, Nur-Sultan 010000, Kazakhstan

\* Correspondence: rostislav.bukasov@nu.edu.kz

SEM and TEM

**Table S1.** Calculation of surface density of nanoparticles using SEM images.

| Nanoparticles | SEM image magnification | Number of nanoparticles, N | Area of surface, $\mu\text{m}^2$ | Surface density, $\text{N}/\mu\text{m}^2$ |
|---------------|-------------------------|----------------------------|----------------------------------|-------------------------------------------|
| 60 nm AuNPs   | x50000                  | 19                         | 3.32                             | 5.72                                      |
|               | x50000                  | 22                         | 3.32                             | 6.63                                      |
|               | x50000                  | 23                         | 3.32                             | 6.93                                      |
|               | x50000                  | 9                          | 3.32                             | 2.71                                      |
|               | x50000                  | 13                         | 3.32                             | 3.92                                      |
|               | x50000                  | 8                          | 3.32                             | 2.41                                      |
|               | x20000                  | 35                         | 20.02                            | 1.75                                      |
|               | x20000                  | 44                         | 20.02                            | 2.20                                      |
|               | x20000                  | 39                         | 20.02                            | 1.95                                      |
|               | x20000                  | 22                         | 20.02                            | 1.10                                      |
|               |                         |                            | <b>Mean</b>                      | <b>3.53</b>                               |
|               |                         |                            | <b>Standard deviation</b>        | <b>2.14</b>                               |
| 100 nm AuNPs  | x50000                  | 19                         | 3.32                             | 5.72                                      |
|               | x50000                  | 10                         | 3.32                             | 3.01                                      |
|               | x50000                  | 16                         | 3.32                             | 4.82                                      |
|               | x50000                  | 24                         | 3.32                             | 7.23                                      |
|               | x50000                  | 12                         | 3.32                             | 3.61                                      |
|               | x50000                  | 18                         | 3.32                             | 5.42                                      |
|               | x20000                  | 43                         | 20.02                            | 2.15                                      |
|               | x20000                  | 77                         | 20.02                            | 3.85                                      |
|               | x20000                  | 18                         | 20.02                            | 0.90                                      |
|               | x20000                  | 21                         | 20.02                            | 1.05                                      |
|               |                         |                            | <b>Mean</b>                      | <b>3.78</b>                               |
|               |                         |                            | <b>Standard deviation</b>        | <b>2.07</b>                               |
| 100 nm AgNPs  | x50000                  | 30                         | 3.32                             | 9.04                                      |
|               | x50000                  | 15                         | 3.32                             | 4.52                                      |
|               | x20000                  | 27                         | 20.02                            | 1.35                                      |
|               | x20000                  | 14                         | 20.02                            | 0.70                                      |
|               |                         |                            | <b>Mean</b>                      | <b>3.90</b>                               |
|               |                         |                            | <b>Standard deviation</b>        | <b>3.81</b>                               |

**Table S2.** Surface density of nanoparticles.

| Nanoparticles | Total number of nanoparticles, N | Surface density, $\text{N}/\mu\text{m}^2$ | Standard deviation |
|---------------|----------------------------------|-------------------------------------------|--------------------|
| 60 nm AuNPs   | 234                              | 3.53                                      | 2.14               |
| 100 nm AuNPs  | 258                              | 3.78                                      | 2.07               |
| 100 nm AgNPs  | 86                               | 3.90                                      | 3.81               |

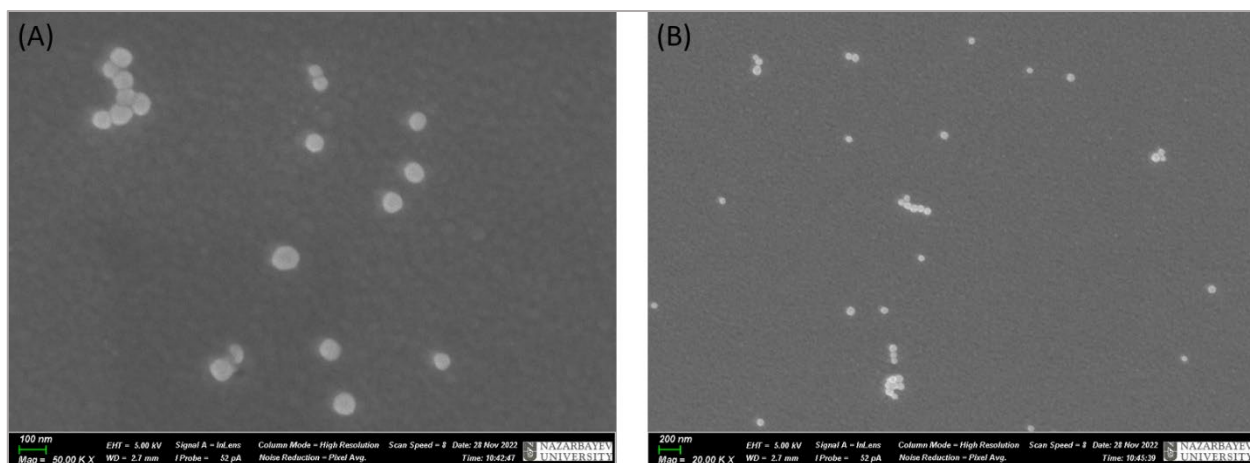

**Figure S1.** SEM pictures of 60 nm Au NPs on the silver substrates. (A) The SEM image of 60 nm Au NPs with magnification of 50,000. (B) The SEM image of 60 nm Au NPs with magnification of 20,000.

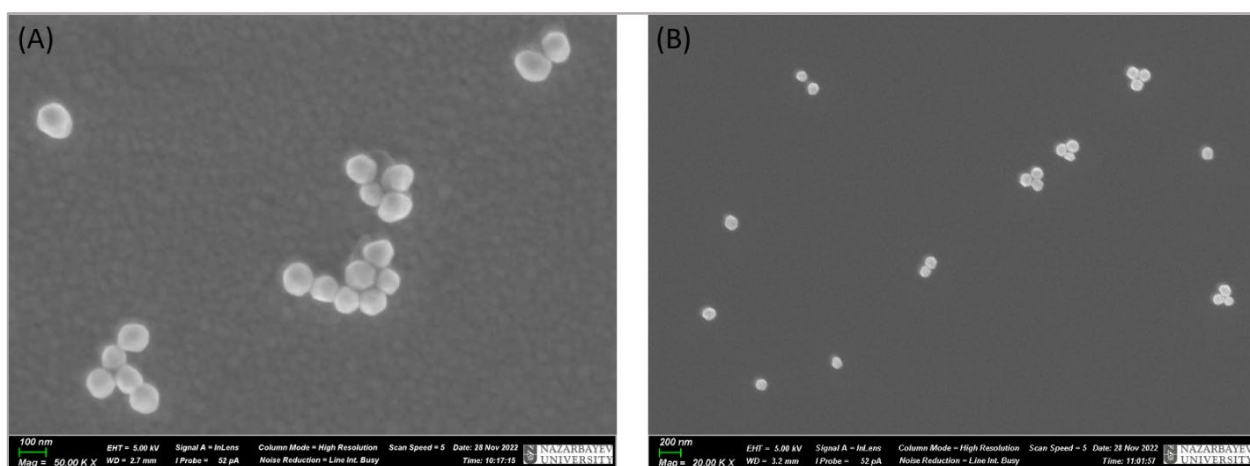

**Figure S2.** Representative SEM images of 100 nm Au NPs on the silver substrates. (A) The SEM image of 100 nm Au NPs with magnification of 50,000. (B) The SEM image of 100 nm Au NPs with magnification of 20,000.

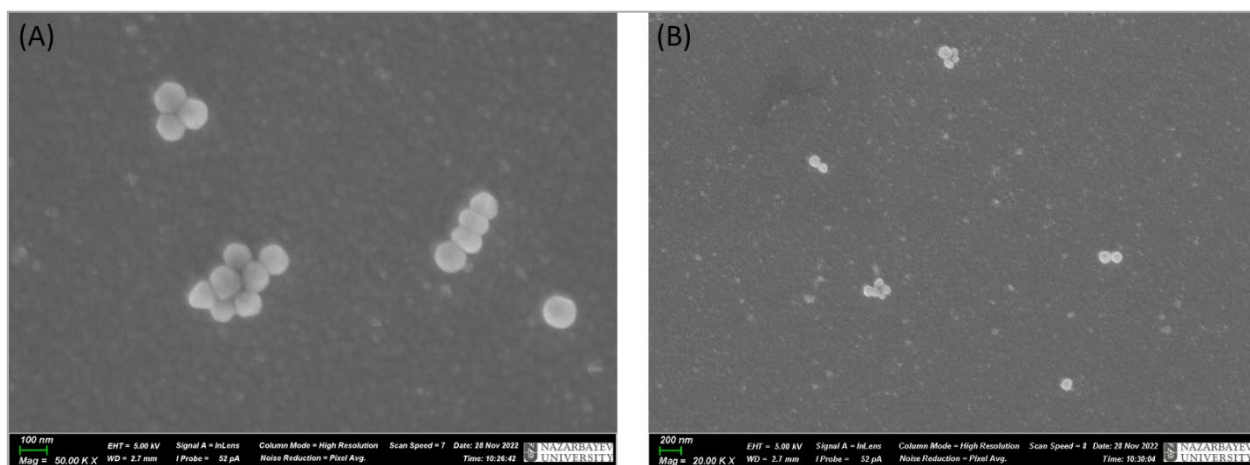

**Figure S3.** Representative SEM images of 100 nm Ag NPs on the silver substrates. (A) The SEM image of 100 nm Ag NPs with magnification of 50,000. (B) The SEM image of 100 nm Ag NPs with magnification of 20,000.

**Table S3.** Results for 100 nm AuNPs @ Au film .

| PC component | Total variance explained, | Sens | Spec | Acc  | AUC  | AUC one-leave-out | AUC sum | TP | TN | FP | FN | No  |
|--------------|---------------------------|------|------|------|------|-------------------|---------|----|----|----|----|-----|
| 5            | 80.0                      | 0.81 | 0.69 | 0.76 | 0.80 | 0.74              | 0.771   | 48 | 36 | 16 | 11 | 111 |
| 7            | 85.4                      | 0.61 | 0.92 | 0.76 | 0.81 | 0.74              | 0.774   | 36 | 48 | 4  | 23 | 111 |
| 9            | 88.3                      | 0.78 | 0.87 | 0.82 | 0.86 | 0.79              | 0.829   | 46 | 45 | 7  | 13 | 111 |
| 11           | 90.4                      | 0.76 | 0.87 | 0.81 | 0.87 | 0.78              | 0.824   | 45 | 45 | 7  | 14 | 111 |
| 13           | 91.9                      | 0.93 | 0.75 | 0.85 | 0.90 | 0.79              | 0.846   | 55 | 39 | 13 | 4  | 111 |
| 15           | 93.1                      | 0.81 | 0.87 | 0.84 | 0.90 | 0.79              | 0.843   | 48 | 45 | 7  | 11 | 111 |
| 17           | 94.0                      | 0.76 | 0.92 | 0.84 | 0.90 | 0.77              | 0.834   | 45 | 48 | 4  | 14 | 111 |
| 19           | 94.8                      | 0.85 | 0.90 | 0.87 | 0.91 | 0.76              | 0.838   | 50 | 47 | 5  | 9  | 111 |
| 21           | 95.4                      | 0.85 | 0.88 | 0.86 | 0.91 | 0.75              | 0.829   | 50 | 46 | 6  | 9  | 111 |
| 23           | 95.9                      | 0.83 | 0.90 | 0.86 | 0.91 | 0.73              | 0.821   | 49 | 47 | 5  | 10 | 111 |
| 25           | 96.4                      | 0.88 | 0.83 | 0.86 | 0.92 | 0.71              | 0.812   | 52 | 43 | 9  | 7  | 111 |

Sens = Sensitivity, Spec = specificity, Acc = accuracy, AUC = area under the curve, TP = true positive, TN = true negative FP = false positive , FN = false negative, No = total number of unique patient samples, AUC sum is average of AUC and AUC one-leave-out.

**Table S4.** Results for 60 nm AuNPs @ Au film .

| PC components | Total variance explained, % | Sensitivity | Specificity | Accuracy | AUC  | AUC one-leave-out | AUC sum | TP | TN | FP | FN | No  |
|---------------|-----------------------------|-------------|-------------|----------|------|-------------------|---------|----|----|----|----|-----|
| 5             | 76.3                        | 0.61        | 0.85        | 0.72     | 0.75 | 0.67              | 0.71    | 36 | 44 | 8  | 23 | 111 |
| 7             | 83.7                        | 0.61        | 0.88        | 0.74     | 0.75 | 0.65              | 0.70    | 36 | 46 | 6  | 23 | 111 |
| 9             | 86.9                        | 0.63        | 0.85        | 0.73     | 0.76 | 0.64              | 0.70    | 37 | 44 | 8  | 22 | 111 |
| 11            | 89.1                        | 0.66        | 0.85        | 0.75     | 0.78 | 0.66              | 0.72    | 39 | 44 | 8  | 20 | 111 |
| 13            | 90.7                        | 0.73        | 0.83        | 0.77     | 0.82 | 0.69              | 0.75    | 43 | 43 | 9  | 16 | 111 |
| 15            | 92.1                        | 0.66        | 0.90        | 0.77     | 0.83 | 0.68              | 0.75    | 39 | 47 | 5  | 20 | 111 |
| 17            | 93.3                        | 0.78        | 0.79        | 0.78     | 0.84 | 0.67              | 0.76    | 46 | 41 | 11 | 13 | 111 |
| 19            | 94.2                        | 0.85        | 0.79        | 0.82     | 0.85 | 0.68              | 0.77    | 50 | 41 | 11 | 9  | 111 |
| 21            | 95.0                        | 0.86        | 0.81        | 0.84     | 0.87 | 0.69              | 0.78    | 51 | 42 | 10 | 8  | 111 |
| 23            | 95.6                        | 0.92        | 0.77        | 0.85     | 0.89 | 0.72              | 0.80    | 54 | 40 | 12 | 5  | 111 |
| 25            | 96.1                        | 0.88        | 0.83        | 0.86     | 0.90 | 0.70              | 0.80    | 52 | 43 | 9  | 7  | 111 |

**Table S5.** Results for 100 nm AgNPs @ Au film .

| PC components | Total variance explained, % | Sensitivity | Specificity | Accuracy | AUC  | AUC one-leave-out | AUC sum | TP | TN | FP | FN | No  |
|---------------|-----------------------------|-------------|-------------|----------|------|-------------------|---------|----|----|----|----|-----|
| 5             | 85.8                        | 0.66        | 0.84        | 0.74     | 0.79 | 0.74              | 0.76    | 38 | 43 | 8  | 20 | 109 |
| 7             | 90.0                        | 0.91        | 0.67        | 0.80     | 0.82 | 0.77              | 0.79    | 53 | 34 | 17 | 5  | 109 |
| 9             | 92.3                        | 0.79        | 0.86        | 0.83     | 0.89 | 0.83              | 0.86    | 46 | 44 | 7  | 12 | 109 |
| 11            | 93.7                        | 0.81        | 0.86        | 0.83     | 0.91 | 0.83              | 0.87    | 47 | 44 | 7  | 11 | 109 |
| 13            | 94.7                        | 0.86        | 0.82        | 0.84     | 0.91 | 0.82              | 0.86    | 50 | 42 | 9  | 8  | 109 |
| 15            | 95.5                        | 0.86        | 0.86        | 0.86     | 0.91 | 0.81              | 0.86    | 50 | 44 | 7  | 8  | 109 |
| 17            | 96.1                        | 0.84        | 0.90        | 0.87     | 0.93 | 0.81              | 0.87    | 49 | 46 | 5  | 9  | 109 |
| 19            | 96.5                        | 0.84        | 0.86        | 0.85     | 0.92 | 0.79              | 0.86    | 49 | 44 | 7  | 9  | 109 |
| 21            | 97.0                        | 0.91        | 0.84        | 0.88     | 0.94 | 0.81              | 0.87    | 53 | 43 | 8  | 5  | 109 |
| 23            | 97.3                        | 0.88        | 0.90        | 0.89     | 0.95 | 0.78              | 0.86    | 51 | 46 | 5  | 7  | 109 |
| 25            | 97.6                        | 0.84        | 0.94        | 0.89     | 0.95 | 0.77              | 0.86    | 49 | 48 | 3  | 9  | 109 |

AUC = area under the curve, TP = true positive, TN = true negative FP = false positive, FN = false negative, No = total number of unique patient samples , AUC sum is average of AUC and AUC one-leave-out.

**Table S6.** Results for 100 nm AgNPs @ Ag film .

| PC components | Total variance explained, % | Sensitivity | Specificity | Accuracy | AUC  | AUC one-leave-out | AUC sum | TP | TN | FP | FN | No  |
|---------------|-----------------------------|-------------|-------------|----------|------|-------------------|---------|----|----|----|----|-----|
| 5             | 87.7                        | 0.79        | 0.57        | 0.69     | 0.69 | 0.59              | 0.64    | 46 | 29 | 22 | 12 | 109 |
| 7             | 90.9                        | 0.71        | 0.69        | 0.70     | 0.73 | 0.64              | 0.69    | 41 | 35 | 16 | 17 | 109 |
| 9             | 93.0                        | 0.90        | 0.59        | 0.75     | 0.78 | 0.69              | 0.73    | 52 | 30 | 21 | 6  | 109 |
| 11            | 94.4                        | 0.59        | 0.86        | 0.72     | 0.80 | 0.68              | 0.74    | 34 | 44 | 7  | 24 | 109 |
| 13            | 95.5                        | 0.91        | 0.57        | 0.75     | 0.80 | 0.67              | 0.74    | 53 | 29 | 22 | 5  | 109 |
| 15            | 96.2                        | 0.76        | 0.71        | 0.73     | 0.80 | 0.65              | 0.73    | 44 | 36 | 15 | 14 | 109 |
| 17            | 96.8                        | 0.91        | 0.59        | 0.76     | 0.82 | 0.65              | 0.73    | 53 | 30 | 21 | 5  | 109 |
| 19            | 97.2                        | 0.69        | 0.88        | 0.78     | 0.85 | 0.69              | 0.77    | 40 | 45 | 6  | 18 | 109 |
| 21            | 97.6                        | 0.88        | 0.69        | 0.79     | 0.86 | 0.67              | 0.76    | 51 | 35 | 16 | 7  | 109 |
| 23            | 97.9                        | 0.81        | 0.78        | 0.80     | 0.87 | 0.65              | 0.76    | 47 | 40 | 11 | 11 | 109 |
| 25            | 98.2                        | 0.79        | 0.84        | 0.82     | 0.87 | 0.64              | 0.76    | 46 | 43 | 8  | 12 | 109 |

**Table S7.** Results for 100 nm AuNPs @ Al tape.

| PC compo nents | Total variance explained, % | Sensitivity | Specificity | Accuracy | AUC  | AUC one-leave-out | AUC sum | TP | TN | FP | FN | No  |
|----------------|-----------------------------|-------------|-------------|----------|------|-------------------|---------|----|----|----|----|-----|
| 5              | 76.4                        | 0.44        | 0.76        | 0.59     | 0.60 | 0.43              | 0.51    | 26 | 39 | 12 | 33 | 110 |
| 7              | 83.0                        | 0.63        | 0.69        | 0.65     | 0.63 | 0.49              | 0.56    | 37 | 35 | 16 | 22 | 110 |
| 9              | 86.7                        | 0.76        | 0.59        | 0.68     | 0.67 | 0.52              | 0.59    | 45 | 30 | 21 | 14 | 110 |
| 11             | 89.1                        | 0.66        | 0.67        | 0.66     | 0.68 | 0.50              | 0.59    | 39 | 34 | 17 | 20 | 110 |
| 13             | 90.8                        | 0.69        | 0.75        | 0.72     | 0.77 | 0.63              | 0.70    | 41 | 38 | 13 | 18 | 110 |
| 15             | 92.1                        | 0.69        | 0.75        | 0.72     | 0.77 | 0.61              | 0.69    | 41 | 38 | 13 | 18 | 110 |
| 17             | 93.2                        | 0.58        | 0.88        | 0.72     | 0.79 | 0.60              | 0.70    | 34 | 45 | 6  | 25 | 110 |
| 19             | 94.1                        | 0.64        | 0.88        | 0.75     | 0.82 | 0.62              | 0.72    | 38 | 45 | 6  | 21 | 110 |
| 21             | 94.8                        | 0.68        | 0.86        | 0.76     | 0.83 | 0.60              | 0.72    | 40 | 44 | 7  | 19 | 110 |
| 23             | 95.3                        | 0.80        | 0.76        | 0.78     | 0.83 | 0.61              | 0.72    | 47 | 39 | 12 | 12 | 110 |
| 25             | 95.9                        | 0.81        | 0.78        | 0.80     | 0.84 | 0.61              | 0.73    | 48 | 40 | 11 | 11 | 110 |

AUC = area under the curve, TP = true positive, TN = true negative, FP = false positive, FN = false negative, No = total number of unique patient samples, AUC sum is average of AUC and AUC one-leave-out.

**Table S8.** Results for 60 nm AuNPs @ Al tape.

| PC compon ents | Total variance explained, % | Sensitivity | Specificity | Accuracy | AUC  | AUC one-leave-out | AUC sum | TP | TN | FP | FN | No  |
|----------------|-----------------------------|-------------|-------------|----------|------|-------------------|---------|----|----|----|----|-----|
| 5              | 78.8                        | 0.68        | 0.63        | 0.66     | 0.68 | 0.58              | 0.63    | 40 | 33 | 19 | 19 | 111 |
| 7              | 85.3                        | 0.83        | 0.54        | 0.69     | 0.71 | 0.59              | 0.65    | 49 | 28 | 24 | 10 | 111 |
| 9              | 88.6                        | 0.63        | 0.83        | 0.72     | 0.77 | 0.67              | 0.72    | 37 | 43 | 9  | 22 | 111 |
| 11             | 90.8                        | 0.63        | 0.85        | 0.73     | 0.77 | 0.64              | 0.71    | 37 | 44 | 8  | 22 | 111 |
| 13             | 92.2                        | 0.71        | 0.81        | 0.76     | 0.78 | 0.63              | 0.71    | 42 | 42 | 10 | 17 | 111 |
| 15             | 93.4                        | 0.68        | 0.85        | 0.76     | 0.78 | 0.61              | 0.70    | 40 | 44 | 8  | 19 | 111 |
| 17             | 94.3                        | 0.56        | 0.94        | 0.74     | 0.78 | 0.59              | 0.69    | 33 | 49 | 3  | 26 | 111 |
| 19             | 95.0                        | 0.58        | 0.92        | 0.74     | 0.78 | 0.56              | 0.67    | 34 | 48 | 4  | 25 | 111 |
| 21             | 95.6                        | 0.56        | 0.90        | 0.72     | 0.78 | 0.56              | 0.67    | 33 | 47 | 5  | 26 | 111 |
| 23             | 96.2                        | 0.63        | 0.88        | 0.75     | 0.80 | 0.55              | 0.67    | 37 | 46 | 6  | 22 | 111 |
| 25             | 96.6                        | 0.66        | 0.85        | 0.75     | 0.82 | 0.56              | 0.69    | 39 | 44 | 8  | 20 | 111 |

**Table S9.** Results for 60 nm AuNPs @ Silicon.

| PC compo nents | Total variance explained, % | Sensitivity | Specificity | Accuracy | AUC  | AUC one-leave-out | AUC sum | TP | TN | FP | FN | No  |
|----------------|-----------------------------|-------------|-------------|----------|------|-------------------|---------|----|----|----|----|-----|
| 5              | 86.1                        | 0.41        | 0.86        | 0.62     | 0.67 | 0.57              | 0.620   | 24 | 44 | 7  | 34 | 109 |
| 7              | 91.0                        | 0.74        | 0.69        | 0.72     | 0.73 | 0.65              | 0.691   | 43 | 35 | 16 | 15 | 109 |
| 9              | 93.4                        | 0.53        | 0.86        | 0.69     | 0.74 | 0.62              | 0.681   | 31 | 44 | 7  | 27 | 109 |
| 11             | 94.6                        | 0.81        | 0.69        | 0.75     | 0.78 | 0.65              | 0.713   | 47 | 35 | 16 | 11 | 109 |
| 13             | 95.4                        | 0.83        | 0.71        | 0.77     | 0.84 | 0.73              | 0.782   | 48 | 36 | 15 | 10 | 109 |
| 15             | 96.0                        | 0.72        | 0.84        | 0.78     | 0.85 | 0.72              | 0.786   | 42 | 43 | 8  | 16 | 109 |
| 17             | 96.5                        | 0.74        | 0.82        | 0.78     | 0.85 | 0.72              | 0.784   | 43 | 42 | 9  | 15 | 109 |
| 19             | 96.9                        | 0.72        | 0.86        | 0.79     | 0.86 | 0.69              | 0.772   | 42 | 44 | 7  | 16 | 109 |
| 21             | 97.2                        | 0.79        | 0.84        | 0.82     | 0.88 | 0.71              | 0.791   | 46 | 43 | 8  | 12 | 109 |
| 23             | 97.5                        | 0.79        | 0.84        | 0.82     | 0.88 | 0.69              | 0.783   | 46 | 43 | 8  | 12 | 109 |
| 25             | 97.8                        | 0.78        | 0.86        | 0.82     | 0.89 | 0.67              | 0.780   | 45 | 44 | 7  | 13 | 109 |

AUC = area under the curve, TP = true positive, TN = true negative FP = false positive, FN = false negative, No = total number of unique patient samples, AUC sum is average of AUC and AUC one-leave-out.

**Table S10.** Summary of average AUC results for various substrates and various nanoparticles .

| Number of PC components     | Au_100nm_ AuNPs | Au_60nm_ AuNPs | Ag_100nm_ AuNPs | Ag_100nm_ AgNPs | Al_tape_100 nm_ AuNPs | Al_tape_60nm_ AuNPs | Si_60nm_ AuNPs |
|-----------------------------|-----------------|----------------|-----------------|-----------------|-----------------------|---------------------|----------------|
| 5                           | 0.771           | 0.711          | 0.765           | 0.642           | 0.515                 | 0.632               | 0.620          |
| 7                           | 0.774           | 0.695          | 0.793           | 0.686           | 0.562                 | 0.651               | 0.691          |
| 9                           | 0.829           | 0.702          | 0.861           | 0.734           | 0.592                 | 0.718               | 0.681          |
| 11                          | 0.824           | 0.724          | 0.869           | 0.737           | 0.589                 | 0.709               | 0.713          |
| 13                          | 0.846           | 0.752          | 0.864           | 0.737           | 0.700                 | 0.706               | 0.782          |
| 15                          | 0.843           | 0.752          | 0.864           | 0.727           | 0.689                 | 0.696               | 0.786          |
| 17                          | 0.834           | 0.756          | 0.869           | 0.734           | 0.698                 | 0.687               | 0.784          |
| 19                          | 0.838           | 0.769          | 0.859           | 0.770           | 0.721                 | 0.673               | 0.772          |
| 21                          | 0.829           | 0.779          | 0.875           | 0.761           | 0.716                 | 0.670               | 0.791          |
| 23                          | 0.821           | 0.805          | 0.865           | 0.761           | 0.723                 | 0.673               | 0.783          |
| 25                          | 0.812           | 0.800          | 0.858           | 0.759           | 0.729                 | 0.687               | 0.780          |
| <b>max</b>                  | <b>0.846</b>    | <b>0.805</b>   | <b>0.875</b>    | <b>0.770</b>    | <b>0.729</b>          | <b>0.718</b>        | <b>0.791</b>   |
| <b>relative performance</b> | <b>118</b>      | <b>112</b>     | <b>122</b>      | <b>107</b>      | <b>102</b>            | <b>100</b>          | <b>110</b>     |

The average AUC is the average of AUC and AUC one-leave- out.

Compassion of Cost: Commercial Gold Film substrates vs Commercial Silicon Wafer Substrates (January 2023)

Ted Pella sells ultra-flat 6 inch silicon wafers for 104.5 USD (28 inch 2 each), a piece for 1-9 pieces ( product number 61015 at [https://www.tedpella.com/vacuum\\_html/Substrates\\_Supports\\_Wafers\\_Slides.htm.aspx](https://www.tedpella.com/vacuum_html/Substrates_Supports_Wafers_Slides.htm.aspx) , or **3.73 USD / inch<sup>2</sup> of Si surface**. The least expensive gold-coated microscope slides from Ted Pella are 92.4 USD for each or **30.8 USD/inch<sup>2</sup>** (product number 26002-G). Gold film on glass surface is 8.3 times more expensive than Si wafer surface, if bought from Ted Pella, USA, which is the most competitive price quote pair available in Kazakhstan to the best of our knowledge . Sigma Aldrich has several times more expensive substrates (both Si wafer ( 22 USD/inch<sup>2</sup>) and Au film(60 USD/inch<sup>2</sup>)) per inch<sup>2</sup>. Before pandemic (fall 2019) the cost ratio per square inch of

gold to silicon wafer substrates for Ted Pella for the same products was about 11 (23.7 USD/inch<sup>2</sup> for gold film and 2.1 USD/inch<sup>2</sup> for silicon wafer) , which shows 30% and 78% price hike from late Fall 2019 to January 2023, making a clear demonstration of inflation (average 9 to 20+% annually for 3 years) in research related consumables and materials.

Overall, the cost of Si surface would be about one order of magnitude lower than the cost of gold film surface, but if NOT ultra-flat Si wafers but a bit lower grade of Si wafers is used, the Silicon substrates would be even less than 10 times costly as any commercially available gold coated substrate.

The cost of 60 nm commercial gold nanoparticles from sigma Aldrich is about 510 USD for 100 mL (467 euro )and we use about  $16 \times 0.015 \text{ mL} = 0.24 \text{ mL}$  of nanoparticles per inch<sup>2</sup>. Therefore, the bottle can cover  $100/0.24 = 417 \text{ inches}^2$  so the AuNP cost per inch<sup>2</sup> is  $510/417 = 1.22 \text{ USD /inch}^2$  or 1.2 USD /inch<sup>2</sup>

For 60 nm AuNPs+ Gold cost is  $30.8+1.2 = 32 \text{ USD per inch}$  and AuNPs +silicon  $3.7+1.2 = 4.9 \text{ USD/inch}^2$

Conclusion In January 2023, when we calculated the cost of materials in Kazakhstan from same companies for both substrates, AuNPs@Gold film substrate is ×6.5 more expensive than AuNPs@Silicon ( even on ultra-smooth silicon wafer)
